# Supplementary material
Source: PubMed Central journal article supplement (PMC2890443)
Supplement: 0914912107_pnas.200914912SI.pdf [file 0914912107_pnas.200914912SI.pdf]

# Supporting Information

Hu et al. 10.1073/pnas.0914912107

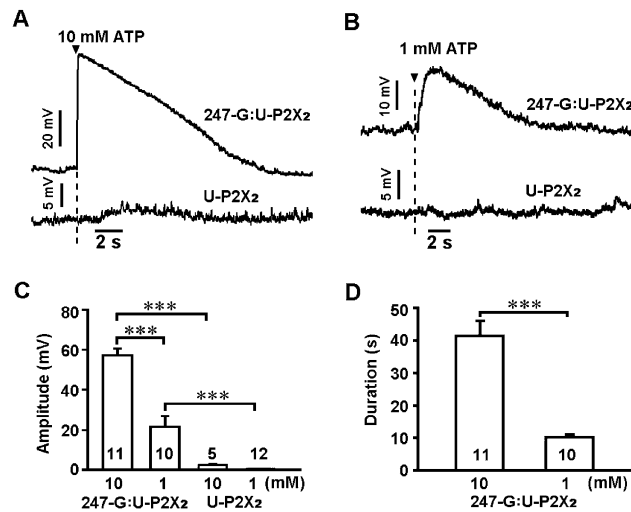

**Fig. S1.** Activation of P2X<sub>2</sub>-expressed Kenyon cells (KCs) by exogenous ATP. P2X<sub>2</sub> is expressed in KCs under the control of 247-Gal4 and ATP is applied to KCs by local puffing, and the membrane potential of KCs of 247-Gal4:UAS-P2X<sub>2</sub> and UAS-P2X<sub>2</sub> flies was monitored by whole-cell recording under current clamp. (A and B) Examples of depolarizations of KCs in 247-Gal4:UAS-P2X<sub>2</sub> flies evoked by puffing 10 or 1 mM ATP, respectively, and no significant effect on KCs in UAS-P2X<sub>2</sub> flies in response to the same ATP puffing. (C) Average peak amplitudes of KC depolarizations observed in two groups of flies illustrated in A and B. (D) Average durations of KC depolarizations observed in 247-Gal4:UAS-P2X<sub>2</sub>. (\*\*\*,  $P < 0.001$ ; t test). Number in bar chart indicates sample size.

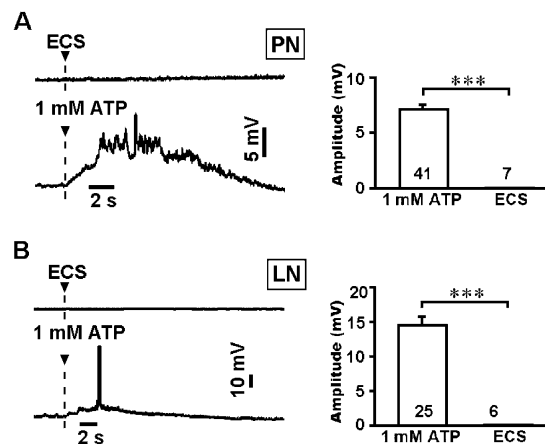

**Fig. S2.** No responses in projection neurons (PNs) and local interneurons (LNs) evoked by the puffing pressure. (A) (Left) Example responses of PNs in 247-Gal4:UAS-P2X<sub>2</sub> flies caused by local puffing of 1 mM ATP or extracellular solution (ECS) at  $\beta\gamma$ -lobes. (Right) Average peak amplitudes. ( $\pm$  SEM; \*\*\*,  $P < 0.001$ ; t test). (B) (Left) Example responses of LNs in 247-Gal4:UAS-P2X<sub>2</sub> flies caused by local puffing of 1 mM ATP or ECS at  $\beta\gamma$ -lobes. (Right) Average peak amplitudes. ( $\pm$  SEM; \*\*\*,  $P < 0.001$ ; t test). Number in bar chart indicates sample size.

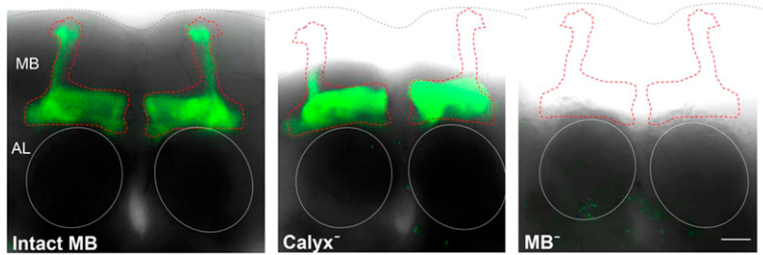

Fig. S3. Photograph to show how calyx (Center) or mushroom body (Right) was ablated. Dash lines indicate the formal brain regions: gray for brain borderline, red for mushroom body, white for antennal lobe. (Scale bar, 20  $\mu\text{m}$ .)

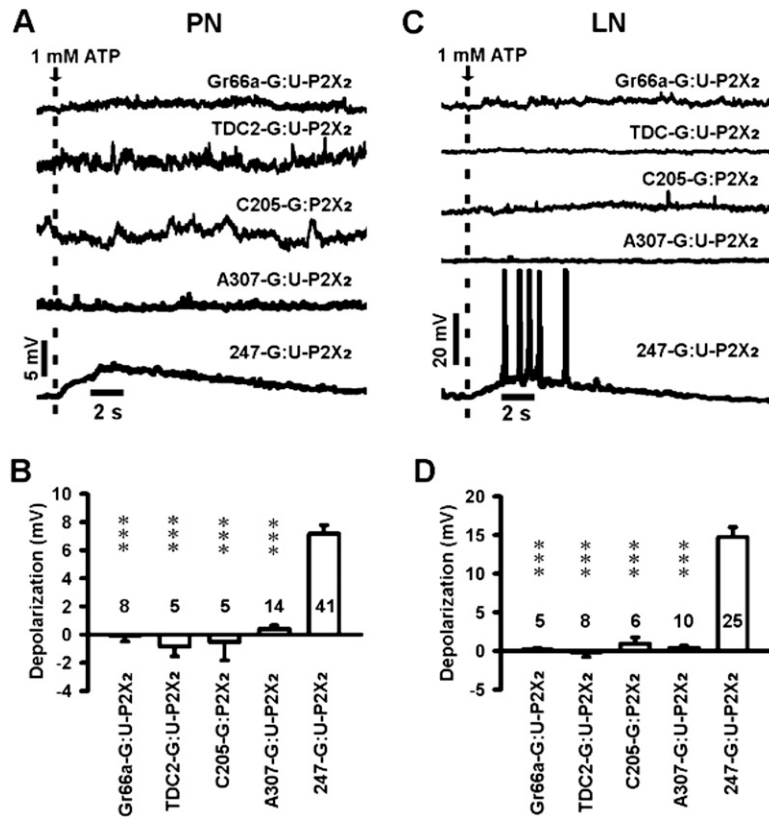

Fig. S4. No significant responses in PNs and LNs were induced by ATP-activation of other type neurons and brain regions expressing P2X<sub>2</sub>. (A and B) Representative responses of PNs/LNs evoked by 1 mM ATP puffing at  $\beta\gamma$ -lobes of P2X<sub>2</sub>-expressed KCs of 247-Gal4 flies, or taste neurons (Gr66a-Gal4), octopaminergic neurons (TDC2-Gal4), central complex (C205-Gal4), or giant fiber system (A307-Gal4) in the fly brains. (C and D) Average peak amplitudes of PN and LN responses in A and B. Number in bar chart indicates sample size.



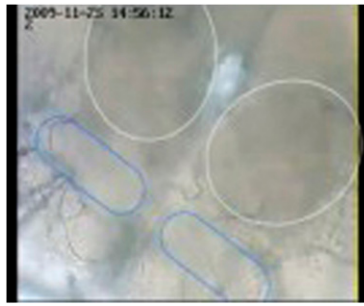

**Movie S3.** Profile of ejected solution after the puffing. To provide further characterization of the ATP puffing method, this movie shows a visual profile of ejected solution containing blue dye (Trypan blue, 0.1%) near the site of application under the same puffing conditions (0.3 s, 4 psi, pipette tip opening of 1  $\mu\text{m}$ ). The oval shape represents the  $\beta\gamma$ -lobes of mushroom bodies and the round shape represents the antennal lobes. As shown in this movie, solution ejected toward the mushroom bodies was very restricted to the desired target region, with no visible diffusion to the antennal lobes.

[Movie S3](#)
